# Supplementary material for: Identification of microRNA-21 target genes associated with hair follicle development in sheep
Source: PeerJ. 2019 Jun 27;7:e7167. doi: 10.7717/peerj.7167 (PMC6599667; doi:10.7717/peerj.7167)
Supplement: Dataset S1 — Each data point indicates the fluorescence value. [file peerj-07-7167-s001.xlsx]

## Sheet: Sheet1
Original fluorescence value	Luc	KLF3-WT+NC	KLF3-WT+oar-miR-21	KLF3-Mut+NC	KLF3-Mut+oar-miR-21	pmiR-RB-REPORTTM	pmiR-RB-REPORTTM+KLF3		CNKSR2-WT+NC	CNKSR2-WT+oar-miR-21	CNKSR2-Mut+NC	CNKSR2-Mut+oar-miR-21	pmiR-RB-REPORTTM	pmiR-RB-REPORTTM+CNKSR2		TNPO1-WT+NC	TNPO1-WT+oar-miR-21	TNPO1-Mut+NC	TNPO1-Mut+oar-miR-21	pmiR-RB-REPORTTM	pmiR-RB-REPORTTM+TNPO1
	1	137656	217432	166704	302968	137001	137343		83020	54832	69976	60252	83011	83018		140768	146640	140584	111368	140712	137644
	2	127128	228056	212228	174104	127088	126918		59836	43664	79456	55304	59814	59833		138024	151404	119800	114852	138001	127011
	3	119572	152092	187344	253452	119412	119332		54364	54248	68172	78908	54357	54366		157788	92796	134604	116288	157712	157599
	Rlu	KLF3-WT+NC	KLF3-WT+oar-miR-21	KLF3-Mut+NC	KLF3-Mut+oar-miR-21	pmiR-RB-REPORTTM	pmiR-RB-REPORTTM+KLF3		CNKSR2-WT+NC	CNKSR2-WT+oar-miR-21	CNKSR2-Mut+NC	CNKSR2-Mut+oar-miR-21	pmiR-RB-REPORTTM	pmiR-RB-REPORTTM+CNKSR2		TNPO1-WT+NC	TNPO1-WT+oar-miR-21	TNPO1-Mut+NC	TNPO1-Mut+oar-miR-21	pmiR-RB-REPORTTM	pmiR-RB-REPORTTM+TNPO1
	1	26680	33520	33656	57764	26677	26649		20848	8756	15880	12816	20847	20850		45004	23052	40128	29232	44993	45018
	2	28232	35088	43744	34472	28214	28240		15344	6756	18904	12588	15341	15349		43260	25556	36580	32160	43276	43287
	3	25460	24216	39020	51412	25451	25457		14080	9576	16656	18220	14078	14082		51484	16096	41924	32784	51464	51511
Fluorescent correction	Rlu/Luc	KLF3-WT+NC	KLF3-WT+oar-miR-21	KLF3-Mut+NC	KLF3-Mut+oar-miR-21	pmiR-RB-REPORTTM	pmiR-RB-REPORTTM+KLF3		CNKSR2-WT+NC	CNKSR2-WT+oar-miR-21	CNKSR2-Mut+NC	CNKSR2-Mut+oar-miR-21	pmiR-RB-REPORTTM	pmiR-RB-REPORTTM+CNKSR2		TNPO1-WT+NC	TNPO1-WT+oar-miR-21	TNPO1-Mut+NC	TNPO1-Mut+oar-miR-21	pmiR-RB-REPORTTM	pmiR-RB-REPORTTM+TNPO1
	1	0.193816	0.154163	0.201891	0.19066	0.194721	0.194032		0.25112	0.159688	0.226935	0.212707	0.251135	0.25115		0.319703	0.157201	0.285438	0.262481	0.319752	0.327061
	2	0.222075	0.153857	0.206118	0.197997	0.222004	0.222506		0.256434	0.154727	0.237918	0.227615	0.256478	0.256531		0.313424	0.168793	0.305342	0.280013	0.313592	0.340813
	3	0.212926	0.159219	0.20828	0.202847	0.213136	0.213329		0.258995	0.176523	0.244323	0.230902	0.258991	0.259022		0.326286	0.173456	0.311462	0.281921	0.326316	0.326849
	Ave	0.209606		0.20543		0.209954	0.209956		0.255516		0.236392		0.255535	0.255568		0.319804		0.300747		0.319887	0.331574
Relative fluorescence value		KLF3-WT+NC	KLF3-WT+oar-miR-21	KLF3-Mut+NC	KLF3-Mut+oar-miR-21	pmiR-RB-REPORTTM	pmiR-RB-REPORTTM+KLF3		CNKSR2-WT+NC	CNKSR2-WT+oar-miR-21	CNKSR2-Mut+NC	CNKSR2-Mut+oar-miR-21	pmiR-RB-REPORTTM	pmiR-RB-REPORTTM+CNKSR2		TNPO1-WT+NC	TNPO1-WT+oar-miR-21	TNPO1-Mut+NC	TNPO1-Mut+oar-miR-21	pmiR-RB-REPORTTM	pmiR-RB-REPORTTM+TNPO1
	1	0.92467	0.73549	0.982774	0.928106	0.927449	0.924158		0.982795	0.624961	0.959994	0.899805	0.982782	0.982715		0.999684	0.491555	0.949095	0.872763	0.99958	0.986389
	2	1.05949	0.734029	1.00335	0.963817	1.05739	1.05977		1.00359	0.605546	1.00645	0.96287	1.00369	1.00377		0.980048	0.527802	1.01528	0.931056	0.980321	1.02786
	3	1.01584	0.759613	1.01388	0.987429	1.01516	1.01607		1.01361	0.690846	1.03355	0.976775	1.01353	1.01352		1.02027	0.542381	1.03563	0.937401	1.0201	0.985748
	Ave	1	0.743044	1	0.959784	1	1		1	0.640451	1	0.946483	1	1		1	0.520579	1	0.91374	1	1
	SD	0.0687912	0.0143676	0.0158192	0.0298664	0.0662854	0.069221		0.0157202	0.0447102	0.0372008	0.0410182	0.0157008	0.0157426		0.0201113	0.0261716	0.0452434	0.0356285	0.0198922	0.0241326
		KLF3-WT+NC	KLF3-WT+oar-miR-21	KLF3-Mut+NC	KLF3-Mut+oar-miR-21	pmiR-RB-REPORTTM	pmiR-RB-REPORTTM+KLF3		CNKSR2-WT+NC	CNKSR2-WT+oar-miR-21	CNKSR2-Mut+NC	CNKSR2-Mut+oar-miR-21	pmiR-RB-REPORTTM	pmiR-RB-REPORTTM+CNKSR2		TNPO1-WT+NC	TNPO1-WT+oar-miR-21	TNPO1-Mut+NC	TNPO1-Mut+oar-miR-21	pmiR-RB-REPORTTM	pmiR-RB-REPORTTM+TNPO1
	Ave	1	0.74	1	0.96	1	1		1	0.640451	1	0.946483	1	1		1	0.520579	1	0.91374	1	1
	SD	0.0687912	0.0143676	0.0158192	0.0298664	0.0653276	0.0688129		0.0157202	0.0447102	0.0372008	0.0410182	0.0687901	0.0683278		0.0201113	0.0261716	0.0452434	0.0356285	0.0716739	0.0698649
	p value	KLF3-WT+NC vs. oar-miR-21		0.00318233					CNKSR2-WT+NC vs. oar-miR-21		0.000193713					TNPO1-WT+NC vs. oar-miR-21		1.48207e-05
		KLF3-Mut+NC vs. oar-miR-21		0.10833					CNKSR2-Mut+NC vs. oar-miR-21		0.169457					TNPO1-Mut+NC vs. oar-miR-21		0.060402
		KLF3-WT+ oar-miR-21 vs. Mut + oar-miR-21		0.000346308					CNKSR2-WT+ oar-miR-21 vs. Mut + oar-miR-21		0.000945962					TNPO1-WT+ oar-miR-21 vs. Mut + oar-miR-21		0.00010364

## Sheet: Sheet2
Pos	Name	Ct SYBR	Amount SYBR	Target SYBR
A4	1B	18.77	-
A5	1B	18.65	-
A6	1B	18.35	-
A7	1	27.62	-
A8	1	27.67	-
A9	1	27.69	-
B4	2	23.42	-
B5	2	23.46	-
B6	2	23.49	-
B7	3	23.34	-
B8	3	23.16	-
B9	3	23.03	-
C4	4	27.22	-
C5	4	26.91	-
C6	4	27.26	-
C7	5B	18.88	-
C8	5B	18.16	-
C9	5B	18.39	-
D4	5	25.71
D5	5	25.72
D6	5	25.71
D7	6	24.79	-
D8	6	24.87	-
D9	6	24.81	-
E4	7	23.85
E5	7	23.8
E6	7	23.82
E7	8	27.82	-
E8	8	27.71	-
E9	8	27.86	-
Analysis Parameters
Type of Application	Quantification
Dye(s)	SYBR
Inverted Data	OFF
Threshold setting	Noiseband
Threshold level	88
Baseline setting	Automatic
Baseline range (from cycle no. ... to)	n/a
Drift Correction	OFF

## Sheet: Sheet3
Pos	Name	Ct SYBR	Amount SYBR	Target SYBR
A4	1B	18.71	-
A5	1B	18.45	-
A6	1B	18.61	-
A7	1	21.74	-
A8	1	21.89	-
A9	1	22.02	-
B4	2	24.35	-
B5	2	24.92	-
B6	2	24.56	-
B7	3	25.16	-
B8	3	25.24	-
B9	3	25.63	-
C4	4	26.03	-
C5	4	26.09	-
C6	4	26.14	-
C7	5B	18.52	-
C8	5B	18.31	-
C9	5B	18.6	-
D4	5	20.82
D5	5	20.65
D6	5	20.33
D7	6	25.68	-
D8	6	25.74	-
D9	6	25.91	-
E4	7	26.88
E5	7	26.72
E6	7	26.91
E7	8	27.44	-
E8	8	27.01	-
E9	8	27.42	-
F4	9B	17.99
F5	9B	18.07
F6	9B	18.13
F7	9	19.94
F8	9	19.99
F9	9	20.15
G4	10	26.11
G5	10	26.43
G6	10	26.28
G7	11	27.11
G8	11	27.06
G9	11	27.22
H4	12	28.01
H5	12	28.09
H6	12	27.93
Analysis Parameters
Type of Application	Quantification
Dye(s)	SYBR
Inverted Data	OFF
Threshold setting	Noiseband
Threshold level	88
Baseline setting	Automatic
Baseline range (from cycle no. ... to)	n/a
Drift Correction	OFF
