# Supplementary material for: Identification of microRNA-21 target genes associated with hair follicle development in sheep
Source: PeerJ. 2019 Jun 27;7:e7167. doi: 10.7717/peerj.7167 (PMC6599667; doi:10.7717/peerj.7167)
Supplement: Dataset S2 — Each data point indicates the Ct value. [file peerj-07-7167-s002.xlsx]

## Sheet: Sheet1
Pos	Name	Ct SYBR	Amount SYBR	Target SYBR
A4	1B	18.77	-
A5	1B	18.65	-
A6	1B	18.35	-
A7	1	27.62	-
A8	1	27.67	-
A9	1	27.69	-
B4	2	23.42	-
B5	2	23.46	-
B6	2	23.49	-
B7	3	23.34	-
B8	3	23.16	-
B9	3	23.03	-
C4	4	27.22	-
C5	4	26.91	-
C6	4	27.26	-
C7	5B	18.88	-
C8	5B	18.16	-
C9	5B	18.39	-
D4	5	25.71
D5	5	25.72
D6	5	25.71
D7	6	24.79	-
D8	6	24.87	-
D9	6	24.81	-
E4	7	23.85
E5	7	23.8
E6	7	23.82
E7	8	27.82	-
E8	8	27.71	-
E9	8	27.86	-
Analysis Parameters
Type of Application	Quantification
Dye(s)	SYBR
Inverted Data	OFF
Threshold setting	Noiseband
Threshold level	88
Baseline setting	Automatic
Baseline range (from cycle no. ... to)	n/a
Drift Correction	OFF
