# Supplementary material for: Identification of microRNA-21 target genes associated with hair follicle development in sheep
Source: PeerJ. 2019 Jun 27;7:e7167. doi: 10.7717/peerj.7167 (PMC6599667; doi:10.7717/peerj.7167)
Supplement: Dataset S3 — Each data point indicates the Ct value. [file peerj-07-7167-s003.xlsx]

## Sheet: Sheet1
Pos	Name	Ct SYBR	Amount SYBR	Target SYBR
A4	1B	18.71	-
A5	1B	18.45	-
A6	1B	18.61	-
A7	1	21.74	-
A8	1	21.89	-
A9	1	22.02	-
B4	2	24.35	-
B5	2	24.92	-
B6	2	24.56	-
B7	3	25.16	-
B8	3	25.24	-
B9	3	25.63	-
C4	4	26.03	-
C5	4	26.09	-
C6	4	26.14	-
C7	5B	18.52	-
C8	5B	18.31	-
C9	5B	18.6	-
D4	5	20.82
D5	5	20.65
D6	5	20.33
D7	6	25.68	-
D8	6	25.74	-
D9	6	25.91	-
E4	7	26.88
E5	7	26.72
E6	7	26.91
E7	8	27.44	-
E8	8	27.01	-
E9	8	27.42	-
F4	9B	17.99
F5	9B	18.07
F6	9B	18.13
F7	9	19.94
F8	9	19.99
F9	9	20.15
G4	10	26.11
G5	10	26.43
G6	10	26.28
G7	11	27.11
G8	11	27.06
G9	11	27.22
H4	12	28.01
H5	12	28.09
H6	12	27.93
Analysis Parameters
Type of Application	Quantification
Dye(s)	SYBR
Inverted Data	OFF
Threshold setting	Noiseband
Threshold level	88
Baseline setting	Automatic
Baseline range (from cycle no. ... to)	n/a
Drift Correction	OFF
