# Supplementary material for: Identification of microRNA-21 target genes associated with hair follicle development in sheep
Source: PeerJ journal article supplement (doi:10.7717/peerj.7167), 2019-06-27
Supplement: DatasetS4.pdf [file DatasetS4.pdf]

## 双荧光素酶载体构建实验报告

### 实验简介

利用 PCR 方法, 根据 KLF3 (*Ovis aries*) 3'UTR 序列信息设计其扩增引物, 以 *Ovis aries* 基因组 DNA 为模板 PCR 扩增 KLF3 基因的 3' UTR 序列, 将其克隆到 **pmiR-RB-REPORT™** 双荧光素酶报告载体中, 所用载体的报告荧光为 hRluc, 校正荧光为 hluc (做内参校正)。

### 实验步骤及结果:

#### 一、基因序列分析

对基因序列及载体序列分析, 可以利用 **XhoI**, **NotI** 两个限制性内切酶将目的基因片段克隆到载体中, 载体图谱如下:

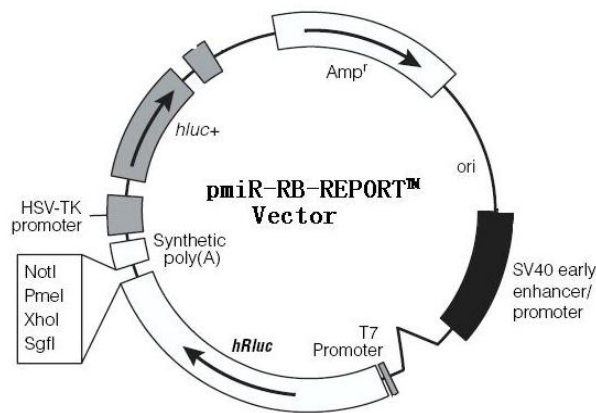

设计扩增引物如下:

oar\_KLF3\_3UTR\_F: GGC**GGCTCGAG**AGTGTTGCACTAATGTGGA

oar\_KLF3\_3UTR\_R: AAT**GCGGCCGCG**GAGTAGAAACAGAGAAGGAAC

红色分别为 **XhoI**, **NotI** 酶切位点序列, 之前序列为保护碱基, 引物扩增总长度为 607bp。

oar\_KLF3\_mut\_F: TATATTTTATTCGAAATAAGACTGAATGGGTA

oar\_KLF3\_mut\_R: GTCTATTTTCGAATAAAAATATATTACTTTA

#### 二、PCR

反应体系设计为 30  $\mu$ l 总体系, 具体是 5 $\times$ Phusion Buffer 6  $\mu$ l, 2.5 mM dNTP mix 2.4  $\mu$ l, 上下游引物 (10  $\mu$ M) 各 1  $\mu$ l, Phusion DNA 聚合酶 (2 U/ $\mu$ l) 0.3  $\mu$ l, DNA 模板 1  $\mu$ l (约 100 ng), 用灭菌水补足 30  $\mu$ l 体系。反应条件为 (降落 PCR): 98 $^{\circ}$ C 2 分钟预变性, 循环内 98 $^{\circ}$ C 10 秒变性, 从 65 $^{\circ}$ C 每个循环降 1 $^{\circ}$ C 退火, 72 $^{\circ}$ C 延伸 30 秒, 10 个循环; 再 98 $^{\circ}$ C 10 秒变性, 60 $^{\circ}$ C 退火, 72 $^{\circ}$ C 延伸 30 秒, 进行 15 个循环; PCR 反应循环后 72 $^{\circ}$ C 继续延伸 3 分钟, 然后 4 $^{\circ}$ C 保存。

PCR 反应完取 5  $\mu$ l PCR 产物进行 1.5% 琼脂糖电泳分析, 如下:

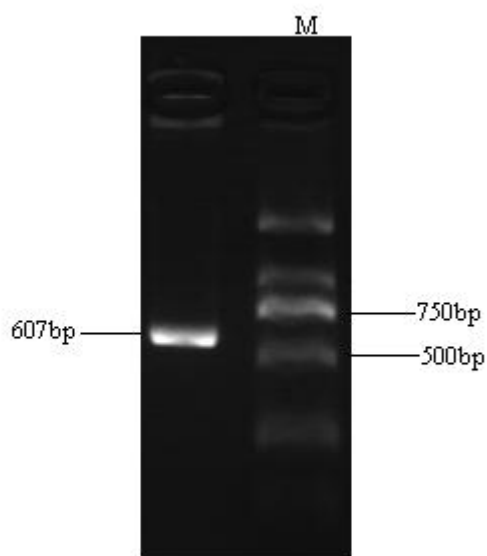

备注：M: D2000；扩增大小与理论大小相符。

### 三、PCR 产物的纯化

按照凝胶纯化试剂盒说明书进行纯化产物。

### 四、酶切

用 *XhoI*, *NotI* 对上述纯化产物和载体进行双酶切，酶切反应体系如下：10×H 缓冲液 4 μl，DNA 约 2 μg，内切酶(10 U/μl) 各 1 μl，灭菌去离子水补足到 40 μl。反应条件 37℃，4 小时。

### 五、酶切回收纯化

酶切后回收纯化酶切产物。按照纯化试剂盒说明书进行纯化产物。

### 六、连接

连接反应体系如下：

目的片段 DNA 2 μl(约 150 ng)，载体 0.5 μl(约 50 ng)，solution I 快速连接液 5 μl，灭菌去离子水补足到 10 μl，16℃ 连接 30 分钟。

### 七、转化

- 1、取连接产物加到 100 μl DH5α 感受态细胞中混匀，冰浴 30 分钟。
- 2、将上述转化液置于 42℃ 水浴 90 秒，取出后立即置于冰浴中放置 2-3 分钟。
- 3、向其中加入 900 μl 37℃ 预热的 LB（不含抗生素）培养基，150 rpm、37℃ 振荡培养 45 分钟。
- 4、2500 rpm 离心 5 分钟，将上清液吸走，留 100 μl 混匀菌液，加到含 Amp 抗生素 LB 固体琼脂培养基上（抗生素浓度 100 μg/ml），用无菌的弯头玻璃棒轻轻的将细胞均匀涂开。待平板表面干燥后，倒置平板，37℃ 培养 12-16 小时。

### 八、菌落 PCR 鉴定

挑取上述平板上的单菌落，溶到 3 μl 水中，取 0.5 μl 做模板，进行 PCR。反应体系设计为 10 μl 总体系，具体是 10×Taq buffer Buffer 1 μl，25 mM MgCl<sub>2</sub> 1.6 μl，2.5 mM dNTP mix 1 μl，载体上下游引物（10 μM）各 0.5 μl，Taq DNA 聚合酶（2.5 U/μl）0.3 μl，

DNA 模板 0.5  $\mu$ l (约 100 ng), 用灭菌水补足 10  $\mu$ l 体系。反应条件为 95 $^{\circ}$ C 3 分钟预变性, 循环内 95 $^{\circ}$ C 30 秒变性, 56 $^{\circ}$ C 退火, 72 $^{\circ}$ C 延伸 1 分钟; 20 个循环; PCR 反应循环后 72 $^{\circ}$ C 继续延伸 3 分钟, 然后 4 $^{\circ}$ C 保存。

实验共挑取 5 个菌落, 进行 PCR。PCR 反应完取 5  $\mu$ l PCR 产物进行 1.5% 琼脂糖电泳分析, 用载体上游和载体下游引物扩增的条带理论大小为 850bp 左右, 其实际扩增条带如下:

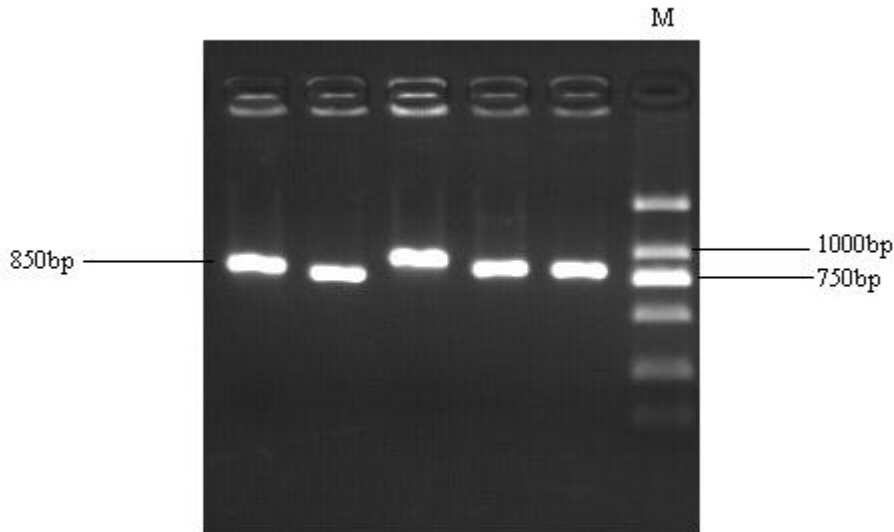

备注: M: D2000 ; 菌 P 大小与理论大小相符。

#### 九、将阳性的克隆送测序公司测序进一步鉴定 (广州市锐博生物科技有限公司), 详细测序结果请参考附件

(加黑划线标注为插入序列, 两边为载体序列)

```
GGACGCTCCAGATGAAAATGGGTAAGTACATCAAGAGCTTCGTGGAGCGCGTGCTGAAGAACGAGCAGTAATTCTAGGCGA
TCGCTCGAGAGTGTGACTAATGTGGAATTTGAAAACTATATTGCTGATACTGTATATCTGCACATCATTCCCTGATTAGATT
GTTTAAAAGACAATCTCAAAGGTCTAAGGTTTTAAAATAATTTGGTTGGTTTAAAATACACAGTCATCTTGAAGGAATCAC
TGTCATGCATGAAGTTGTTTCAGAGTGGTCTTATTCTCTTCTGGTCAAGGTTAACAATTTCTAAATGATTGCAAATTCACCTA
AATAATACATTTACAAAGCCATTTTACATGCATTAACGAGGGCTACAACAATACTATGTTTTACAAATACTAGCACATTTTTTT
TTGCTGTTATGTACTTAGTGTAGAGGGTCAAATAATCTTCTGCTTAGCATCTCTTAAACCATACCTGCAAATATAGCAGGA
TTATTACATTTACAGTACTTTAATACTTGTATAAACTATGCAGAAATTTTTAATAAAAGTGTAATATATTTTATAAGCTAATAAGAC
TGAATGGGTAAAGGTTTTTAGCATGCATTAAGTATACTTGCAAATACTGAAACATTTTGGTAATCTTCTTACTAAAGATGTGAA
TGTTAATGTTTCTTCTGTTTCTACTCGCGGCCGCTGGCCGCAATAAAATATCTTTAATTTTTTACTTACATCTGTGTGTTGGTT
TTTTGTGTGAGGATCTAAATGAGTCTTCGGACCTCGCGGGGG
```

#### 十、突变载体构建

利用 PCR 突变的方法, 在野生型载体基础上, 设计突变引物将靶序列 **ATAAGCT** 突变为 **TATTCGA**。

##### 1、突变分段 PCR

以野生型载体为模板, 分别扩增含突变序列的两段序列。反应体系设计为 30  $\mu$ l 总体系, 具体是 5 $\times$ Phusion Buffer 6  $\mu$ l, 2.5 mM dNTP mix 2.4  $\mu$ l, 上下游引物 (10  $\mu$ M) 各 1  $\mu$ l (上游引物与突变下游引物配对, 突变上游引物与下游引物配对), Phusion DNA 聚合酶 (2 U/ $\mu$ l) 0.3  $\mu$ l, DNA 模板 1  $\mu$ l (约 100 ng), 用灭菌水补足 30  $\mu$ l 体系。反应条件为 (降落 PCR): 98 $^{\circ}$ C 2 分钟预变性, 循环内 98 $^{\circ}$ C 10 秒变性, 从 65 $^{\circ}$ C 每个循环降 1 $^{\circ}$ C 退火, 72 $^{\circ}$ C 延伸 30 秒; 10 个循环; 再 98 $^{\circ}$ C 10 秒变性, 60 $^{\circ}$ C 退火, 72 $^{\circ}$ C 延伸 30 秒, 进行 15 个循环; PCR 反应循环后 72 $^{\circ}$ C 继续延伸 3 分钟, 然后 4 $^{\circ}$ C 保存。

PCR 反应完取 PCR 产物进行1.5%琼脂糖电泳分析并纯化回收。按照纯化试剂盒说明书进行纯化产物。

## 2、突变两段拼接

反应体系设计为10  $\mu$ l 总体系，具体是上述纯化产物各取1  $\mu$ l，5 $\times$ Phusion Buffer 2  $\mu$ l，2.5 mM dNTP mix 0.8  $\mu$ l。Phusion DNA 聚合酶（2 U/ $\mu$ l）0.1  $\mu$ l，用灭菌水补足10  $\mu$ l 体系。反应条件为（降落 PCR）：98 $^{\circ}$ C 2分钟预变性，循环内98 $^{\circ}$ C 10 秒变性，从60 $^{\circ}$ C每个循环降1 $^{\circ}$ C退火，72 $^{\circ}$ C延伸30秒，7个循环；再98 $^{\circ}$ C 10秒变性，55 $^{\circ}$ C退火，72 $^{\circ}$ C延伸30秒，进行10个循环；PCR 反应循环后72 $^{\circ}$ C继续延伸3分钟，然后4 $^{\circ}$ C保存。

## 3、拼接后 PCR

反应体系设计为30  $\mu$ l 总体系，具体是5 $\times$ Phusion Buffer 6  $\mu$ l，2.5 mM dNTP mix 2.4  $\mu$ l，上下游引物（10  $\mu$ M）各1  $\mu$ l，Phusion DNA 聚合酶（2 U/ $\mu$ l）0.3  $\mu$ l，DNA 模板1  $\mu$ l（约100 ng），用灭菌水补足30  $\mu$ l 体系。反应条件为（降落 PCR）：98 $^{\circ}$ C 2分钟预变性，循环内98 $^{\circ}$ C 10 秒变性，从65 $^{\circ}$ C每个循环降1 $^{\circ}$ C退火，72 $^{\circ}$ C延伸30秒，10个循环；再98 $^{\circ}$ C 10秒变性，60 $^{\circ}$ C退火，72 $^{\circ}$ C延伸30秒，进行15个循环；PCR 反应循环后72 $^{\circ}$ C继续延伸3分钟，然后4 $^{\circ}$ C保存。

PCR 反应完取 PCR 产物进行1.5%琼脂糖电泳分析并纯化回收。按照纯化试剂盒说明书进行纯化产物。

## 4、酶切

用 *Xho*I，*Not*I 对上述纯化产物和载体进行双酶切，酶切反应体系如下：10 $\times$ H 缓冲液 4  $\mu$ l，DNA 约2  $\mu$ g，内切酶(10 U/ $\mu$ l) 各1  $\mu$ l，灭菌去离子水补足到40  $\mu$ l。反应条件37 $^{\circ}$ C，4小时。

## 5、酶切回收纯化

酶切后回收纯化酶切产物。按照纯化试剂盒说明书进行纯化产物。

## 6、连接

连接反应体系如下：

目的片段 DNA 2  $\mu$ l(约150ng)，载体0.5  $\mu$ l(约50ng)，solution I 快速连接液 5  $\mu$ l，灭菌去离子水补足到10  $\mu$ l，16 $^{\circ}$ C连接30分钟。

## 7、转化

- 1) 取连接产物10  $\mu$ l 加到100  $\mu$ l DH5 $\alpha$ 感受态细胞中，混匀，冰浴30分钟。
- 2) 将上述转化液置于42 $^{\circ}$ C水浴90秒，取出后立即置于冰浴中放置2-3分钟。
- 3) 向其中加入900  $\mu$ l 37 $^{\circ}$ C预热的LB(不含抗生素)培养基，150 rpm、37 $^{\circ}$ C振荡培养45分钟。
- 4) 2500 rpm离心5分钟，将上清液吸走，留100  $\mu$ l混匀菌液，加到含Amp抗生素LB固体琼脂培养基上(抗生素浓度100  $\mu$ g/ml)，用无菌的弯头玻棒轻轻的将细胞均匀涂开。待平板表面干燥后，倒置平板，37 $^{\circ}$ C培养12-16小时。

## 8、菌落扩大培养提取质粒

挑取上述平板上的单菌落，接种到含 Amp 抗生素（抗生素浓度100  $\mu$ g/ml）的4 ml LB 液体培养基中，于220 rpm 摇床培养12小时；然后提取质粒。

将质粒送测序公司测序鉴定，详细测序峰图结果请参考附件。

测序结果显示，成功将靶序列 **ATAAGCT 突变为 TATTCGA**。

G C A G A A A T T T T T A A T A A A G T G T A A T A T A T T T T A T A A G C T A A T A A G A C T G A A T G G G T A A A G G T T T

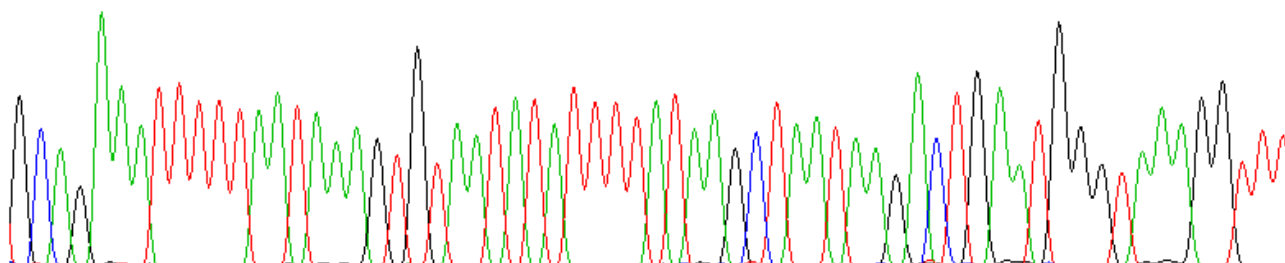

KLF3-WT

G A A A T T T T T A A T A A A G T G T A A T A T A T T T T A T T C G A A A T A A G A C T G A A T G G G T A A A G G T T

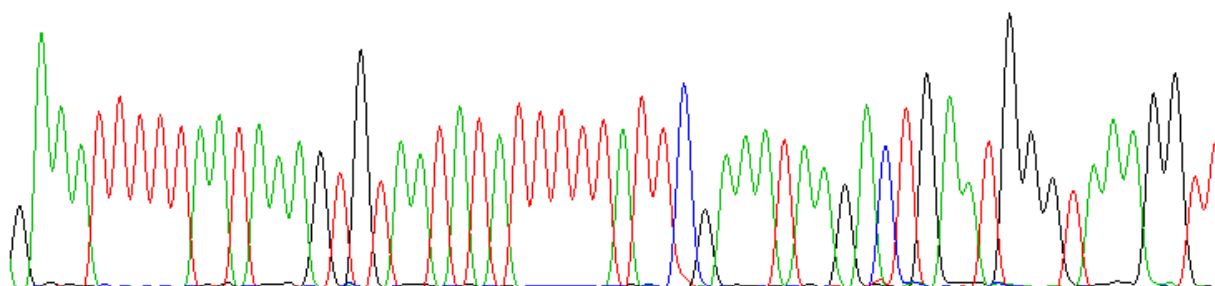

KLF3-MUT

### 主要试剂

|                                               |                  |
|-----------------------------------------------|------------------|
| LB 培养基: 蛋白胨 (tryptone), 酵母提取物 (yeast extract) | OXOID 公司 (英)     |
| 限制性内切酶                                        | Fermentas 公司     |
| TIANprep Mini Plasmid Kit 质粒小提试剂盒             | 天根生化科技 (北京) 有限公司 |
| Phusion DNA 聚合酶                               | Fermentas 公司     |
| 琼脂糖                                           | 西班牙 BioWest 公司   |
| Universal DNA Purification Kit DNA 纯化回收试剂盒    | 天根生化科技 (北京) 有限公司 |
| 连接反应液                                         | Fermentas 公司     |
| 普通 DNA 聚合酶                                    | Fermentas 公司     |
| DH5 $\alpha$ 感受态细胞                            | 天根生化科技 (北京) 有限公司 |

广州市锐博生物科技有限公司  
GUANGZHOU RIBOBIO CO., LTD

地址: 广州开发区科学城科学大道182号创新大厦C3区13层(510663) 电话: (020)32290075 传真: (020)32290137

13/F, Innovation Building C3, 182 kexue Avenue, Science Park, Guangzhou 510663, PR of China

免费热线: 400 686 0075 企业QQ: 4006860075 网站: www.sima.cn www.ribobio.com 邮箱: support@ribobio.com

**主要仪器**

PCR 仪器: Bio-RAD 公司  
引物合成: 苏州金唯智生物科技有限公司  
序列测定: 广州市锐博生物科技有限公司

如果有任何问题，请联系我们！

广州市锐博生物科技有限公司  
地 址: 广州开发区科学城科学大道 182 号创新大厦 C3 区 13 层  
电 话: (020) 32290075  
邮 箱: [service@ribobio.com](mailto:service@ribobio.com)

**广州市锐博生物科技有限公司**  
GUANGZHOU RIBOBIO CO., LTD

地址: 广州开发区科学城科学大道182号创新大厦C3区13层(510663) 电话: (020)32290075 传真: (020)32290137

13/F, Innovation Building C3, 182 kexue Avenue, Science Park, Guangzhou 510663, PR of China

免费热线: 400 686 0075 企业QQ: 4006860075 网站: [www.sima.cn](http://www.sima.cn) [www.ribobio.com](http://www.ribobio.com) 邮箱: [support@ribobio.com](mailto:support@ribobio.com)

## 双荧光素酶载体构建实验报告

### 实验简介

利用 PCR 方法，根据 CNKSR2 (*Ovis aries*) 3'UTR 序列信息设计其扩增引物，以 *Ovis aries* 基因组 DNA 为模板 PCR 扩增 CNKSR2 基因的 3' UTR 序列，将其克隆到 **pmiR-RB-REPORT™** 双荧光素酶报告载体中，所用载体的报告荧光为 hRluc，校正荧光为 hluc（做内参校正）。

### 实验步骤及结果：

#### 一、基因序列分析

对基因序列及载体序列分析，可以利用 **XhoI**、**NotI** 两个限制性内切酶将目的基因片段克隆到载体中，载体图谱如下：



设计扩增引物如下：

oar\_CNKSR2\_3UTR\_F: GGC**GGCTCGAG**TACTACTGCGAGAGTTGGTAGA

oar\_CNKSR2\_3UTR\_R: AAT**GCGGCCG**CCAAGAAGTAAGGAGAAAAGTTAGG

红色分别为 **XhoI**、**NotI** 酶切位点序列，之前序列为保护碱基，引物扩增总长度为 759bp。

oar\_CNKSR2\_mut\_F: ACAGATTGTATT**CGAAATGTTT**AGAGAATTTAG

oar\_CNKSR2\_mut\_R: TAAACATTT**CGAATACAATCTGTG**AGTCCAATG

#### 二、PCR

反应体系设计为 30  $\mu$ l 总体系，具体是 5 $\times$ Phusion Buffer 6  $\mu$ l，2.5 mM dNTP mix 2.4  $\mu$ l，上下游引物 (10  $\mu$ M) 各 1  $\mu$ l，Phusion DNA 聚合酶 (2 U/ $\mu$ l) 0.3  $\mu$ l，DNA 模板 1  $\mu$ l (约 100 ng)，用灭菌水补足 30  $\mu$ l 体系。反应条件为 (降落 PCR)：98 $^{\circ}$ C 2 分钟预变性，循环内 98 $^{\circ}$ C 10 秒变性，从 65 $^{\circ}$ C 每个循环降 1 $^{\circ}$ C 退火，72 $^{\circ}$ C 延伸 30 秒，10 个循环；再 98 $^{\circ}$ C 10 秒变性，60 $^{\circ}$ C 退火，72 $^{\circ}$ C 延伸 30 秒，进行 15 个循环；PCR 反应循环后 72 $^{\circ}$ C 继续延伸 3 分钟，然后 4 $^{\circ}$ C 保存。

PCR 反应完取 5  $\mu$ l PCR 产物进行 1.5% 琼脂糖电泳分析，如下：

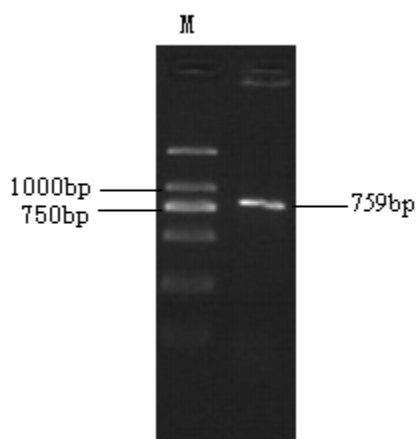

备注：M: D2000；扩增大小与理论大小相符。

### 三、PCR 产物的纯化

按照凝胶纯化试剂盒说明书进行纯化产物。

### 四、酶切

用 *Xho*I, *Not*I 对上述纯化产物和载体进行双酶切，酶切反应体系如下：10×H 缓冲液 4 μl，DNA 约 2 μg，内切酶(10 U/μl) 各 1 μl，灭菌去离子水补足到 40 μl。反应条件 37℃，4 小时。

### 五、酶切回收纯化

酶切后回收纯化酶切产物。按照纯化试剂盒说明书进行纯化产物。

### 六、连接

连接反应体系如下：

目的片段 DNA 2 μl(约 150 ng)，载体 0.5 μl(约 50 ng)，solution I 快速连接液 5 μl，灭菌去离子水补足到 10 μl，16℃ 连接 30 分钟。

### 七、转化

- 1、取连接产物加到 100 μl DH5α 感受态细胞中混匀，冰浴 30 分钟。
- 2、将上述转化液置于 42℃ 水浴 90 秒，取出后立即置于冰浴中放置 2-3 分钟。
- 3、向其中加入 900 μl 37℃ 预热的 LB（不含抗生素）培养基，150 rpm、37℃ 振荡培养 45 分钟。
- 4、2500 rpm 离心 5 分钟，将上清液吸走，留 100 μl 混匀菌液，加到含 Amp 抗生素 LB 固体琼脂培养基上（抗生素浓度 100 μg/ml），用无菌的弯头玻璃棒轻轻的将细胞均匀涂开。待平板表面干燥后，倒置平板，37℃ 培养 12-16 小时。

### 八、菌落 PCR 鉴定

挑取上述平板上的单菌落，溶到 3 μl 水中，取 0.5 μl 做模板，进行 PCR。反应体系设计为 10 μl 总体系，具体是 10×Taq buffer Buffer 1 μl，25 mM MgCl<sub>2</sub> 1.6 μl，2.5 mM dNTP mix 1 μl，载体上下游引物（10 μM）各 0.5 μl，Taq DNA 聚合酶（2.5 U/μl）0.3 μl，DNA 模板 0.5 μl（约 100 ng），用灭菌水补足 10 μl 体系。反应条件为 95℃ 3 分钟预变性，循环内 95℃ 30 秒变性，56℃ 退火，72℃ 延伸 1 分钟；20 个循环；PCR 反应循环后 72℃ 继续延伸 3 分钟，然后 4℃ 保存。

实验共挑取 5 个菌落，进行 PCR。PCR 反应完取 5 μl PCR 产物进行 1.5% 琼脂糖电泳分析，用载体上游和载体下游引物扩增



的条带理论大小为1000bp左右，其实际扩增条带如下：

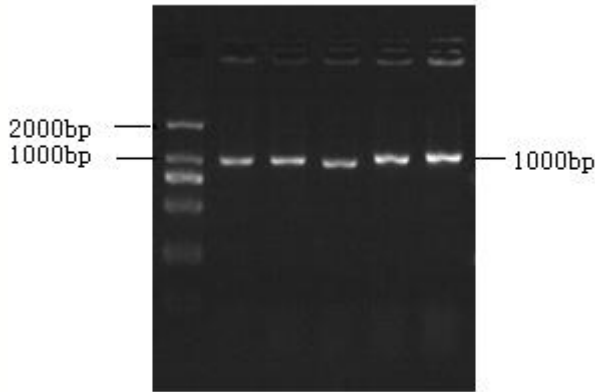

备注：M: D2000；菌P大小与理论大小相符。

## 九、将阳性的克隆送测序公司测序进一步鉴定（广州市锐博生物科技有限公司），详细测序结果请参考附件

（加黑划线标注为插入序列，两边为载体序列）

ATGGGTAAGTACATCAAGAGCTTCGTGGAGCGCGTGCTGAAGAACGAGCAGTAATTCTAGGCGATCGCTCGAGTACACTGC  
 GAGAGTTGGTAGAACCTCTCCATGCCAAATCGGATCCACTTCTGTTGGCACTCAACCCATTGGACTCACAGATTGATAAGCT  
AATGTTTAGAGAATTTAGATCGGAGAGAGTCGGCACGACGCAGACTTAACATCAACCTCTTGCAAGCAACTAAAATGGCCT  
CGTCCTTGCTGTTTATAACAGAAAACAGACTTTTAAAAGCTTAGATCATCAAGTGTTTTGGATTGGGGGCCTCCCTAAAGGG  
ATATTAAGAGGGGCAGGCCACTCTTAAGAAGAATGCAAGCTTCTTCACTGGGACTAGCATAAGATCAAAGCCAATCAAGA  
TGGAGCACAGTGACAGAAAACCTGCTGTTTCTGTGGGTGAACAGAGGGAAAGGGCACTGACTGGGGAAGGGCTCAGTTGT  
GTTCTCCTGTACAGGAAAGGAGAGGGATCAGCTCCAATAACTAGAAAACCCTGGCTGTTCAATGGACTCTTAAGTGGCCT  
CTTGAAGCAAAGCAGAGAAAAGCAAATCTGTGTGTTAAGTGTATTTTCGCAATTTTAAAATTTGACGTGCTGTATTGTACTAC  
ATTAAGTGTAATCTTAAGGCAAGGTATCTACAACCTGCTCTGAAACTTACTATGTTTATTCTATTATAAAGTGTATTCAGGTGC  
AACACAGAGACTGCTTTCAGTGGCACTAATGAAGAAAATGCCACATGCCAGGCTTTAGTAGATTCCTCAGCTAAAATCCTAA  
CTTCTCCTTACTTCTTGGCGGCCGCTGGCCGCAATAAAAATATCTTTATTTCATTACATCTGT

## 十、突变载体构建

利用PCR突变的方法，在野生型载体基础上，设计突变引物将靶序列 **ATAAGCT** 突变为 **TATTCGA**。

### 1、突变分段PCR

以野生型载体为模板，分别扩增含突变序列的两段序列。反应体系设计为30 μl 总体系，具体是5×Phusion Buffer 6 μl，2.5 mM dNTP mix 2.4 μl，上下游引物（10 μM）各1 μl（上游引物与突变下游引物配对，突变上游引物与下游引物配对），Phusion DNA 聚合酶（2 U/μl）0.3 μl，DNA 模板 1 μl（约100 ng），用灭菌水补足30 μl 体系。反应条件为（降落PCR）：98℃ 2分钟预变性，循环内98℃ 10秒变性，从65℃每个循环降1℃退火，72℃延伸30秒；10个循环；再98℃ 10秒变性，60℃退火，72℃延伸30秒，进行15个循环；PCR 反应循环后72℃继续延伸3分钟，然后4℃保存。

PCR 反应完取 PCR 产物进行1.5%琼脂糖电泳分析并纯化回收。按照纯化试剂盒说明书进行纯化产物。

### 2、突变两段拼接

反应体系设计为10 μl 总体系，具体是上述纯化产物各取1 μl，5×Phusion Buffer 2 μl，2.5 mM dNTP mix 0.8 μl。Phusion DNA 聚合酶（2 U/μl）0.1 μl，用灭菌水补足10 μl 体系。反应条件为（降落PCR）：98℃ 2分钟预变性，循环内98℃ 10 秒变性，从60℃每个循环降1℃退火，72℃延伸30秒，7个循环；再98℃ 10秒变性，55℃退火，72℃延伸30秒，进行10个循环；PCR 反应循

环后72℃继续延伸3分钟，然后4℃保存。

### 3、拼接后 PCR

反应体系设计为30 μl 总体系，具体是5×Phusion Buffer 6 μl，2.5 mM dNTP mix 2.4 μl，上下游引物（10 μM）各1 μl，Phusion DNA 聚合酶（2 U/μl）0.3 μl，DNA 模板1 μl（约100 ng），用灭菌水补足30 μl 体系。反应条件为（降落 PCR）：98℃ 2分钟预变性，循环内98℃ 10 秒变性，从65℃每个循环降1℃退火，72℃延伸30秒，10个循环；再98℃ 10秒变性，60℃退火，72℃延伸30秒，进行15个循环；PCR 反应循环后72℃继续延伸3分钟，然后4℃保存。

PCR 反应完取 PCR 产物进行1.5%琼脂糖电泳分析并纯化回收。按照纯化试剂盒说明书进行纯化产物。

### 4、酶切

用 *XhoI*，*NotI* 对上述纯化产物和载体进行双酶切，酶切反应体系如下：10×H 缓冲液 4 μl，DNA 约2 μg，内切酶(10 U/μl) 各1 μl，灭菌去离子水补足到40 μl。反应条件37℃，4小时。

### 5、酶切回收纯化

酶切后回收纯化酶切产物。按照纯化试剂盒说明书进行纯化产物。

### 6、连接

连接反应体系如下：

目的片段 DNA 2 μl(约150ng)，载体0.5 μl(约50ng)，solution I 快速连接液 5 μl，灭菌去离子水补足到10 μl，16℃连接30分钟。

### 7、转化

1) 取连接产物10 μl 加到100 μl DH5α感受态细胞中，混匀，冰浴30分钟。

2) 将上述转化液置于42℃水浴90秒，取出后立即置于冰浴中放置2-3分钟。

3) 向其中加入900 μl 37℃预热的LB(不含抗生素)培养基，150 rpm、37℃振荡培养45分钟。

4) 2500 rpm离心5分钟，将上清液吸走，留100 μl混匀菌液，加到含Amp抗生素LB固体琼脂培养基上(抗生素浓度100 μg/ml)，用无菌的弯头玻璃棒轻轻的将细胞均匀涂开。待平板表面干燥后，倒置平板，37℃培养12-16小时。

### 8、菌落扩大培养提取质粒

挑取上述平板上的单菌落，接种到含 Amp 抗生素（抗生素浓度100 μg/ml）的4 ml LB 液体培养基中，于220 rpm 摇床培养12小时；然后提取质粒。

将质粒送测序公司测序鉴定，详细测序峰图结果请参考附件。

测序结果显示，成功将靶序列 **ATAAGCT** 突变为 **TATTCGA**。

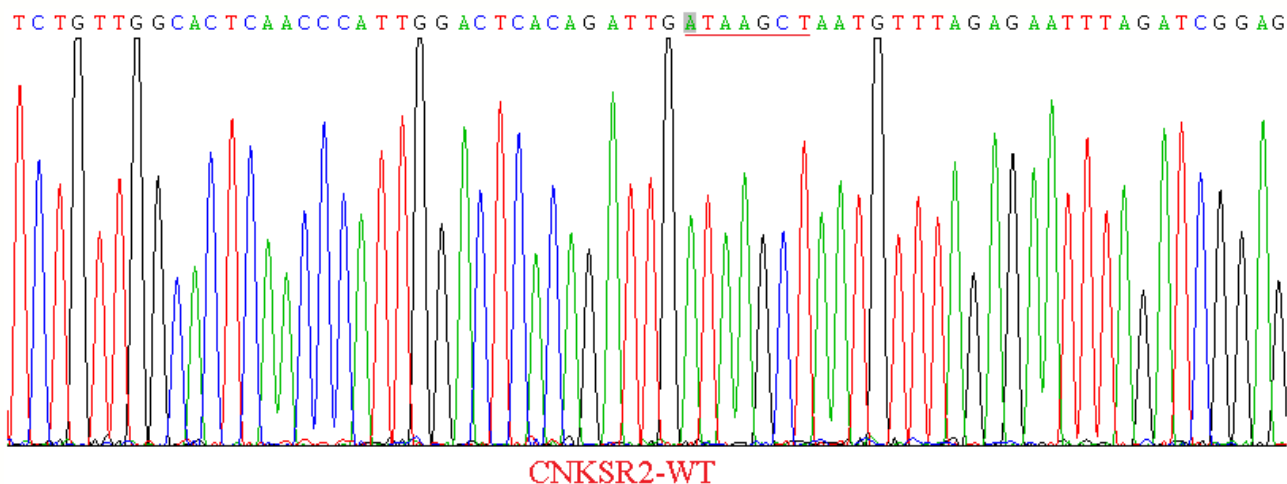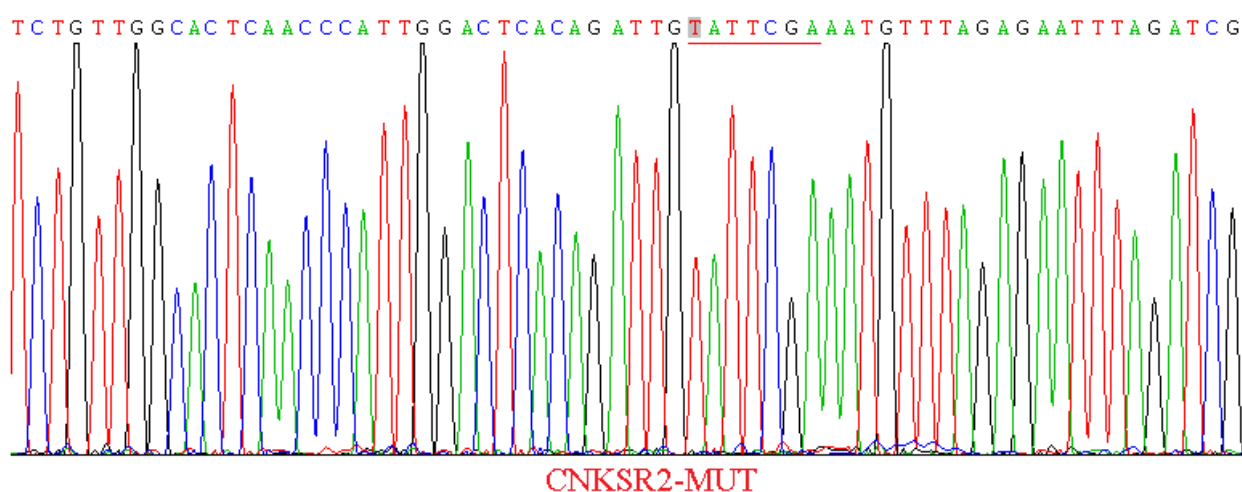

### 主要试剂

|                                               |                  |
|-----------------------------------------------|------------------|
| LB 培养基: 蛋白胨 (tryptone), 酵母提取物 (yeast extract) | OXOID 公司 (英)     |
| 限制性内切酶                                        | Fermentas 公司     |
| TIANprep Mini Plasmid Kit 质粒小提试剂盒             | 天根生化科技 (北京) 有限公司 |
| Phusion DNA 聚合酶                               | Fermentas 公司     |
| 琼脂糖                                           | 西班牙 BioWest 公司   |
| Universal DNA Purification Kit DNA 纯化回收试剂盒    | 天根生化科技 (北京) 有限公司 |
| 连接反应液                                         | Fermentas 公司     |
| 普通 DNA 聚合酶                                    | Fermentas 公司     |
| DH5α 感受态细胞                                    | 天根生化科技 (北京) 有限公司 |

### 主要仪器

## 广州市锐博生物科技有限公司

GUANGZHOU RIBOBIO CO., LTD

地址: 广州开发区科学城科学大道182号创新大厦C3区13层(510663) 电话: (020)32290075 传真: (020)32290137

13/F, Innovation Building C3, 182 kexue Avenue, Science Park, Guangzhou 510663, PR of China

免费热线: 400 686 0075 企业QQ: 4006860075 网站: www.sima.cn www.ribobio.com 邮箱: support@ribobio.com

PCR 仪器: Bio-RAD 公司  
引物合成: 苏州金唯智生物科技有限公司  
序列测定: 广州市锐博生物科技有限公司

如果有任何问题, 请联系我们!

广州市锐博生物科技有限公司  
地 址: 广州开发区科学城科学大道 182 号创新大厦 C3 区 13 层  
电 话: (020) 32290075  
邮 箱: [service@ribobio.com](mailto:service@ribobio.com)

**广州市锐博生物科技有限公司**  
GUANGZHOU RIBOBIO CO., LTD

地址: 广州开发区科学城科学大道182号创新大厦C3区13层(510663) 电话: (020)32290075 传真: (020)32290137

13/F, Innovation Building C3, 182 kexue Avenue, Science Park, Guangzhou 510663, PR of China

免费热线: 400 686 0075 企业QQ: 4006860075 网站: [www.sima.cn](http://www.sima.cn) [www.ribobio.com](http://www.ribobio.com) 邮箱: [support@ribobio.com](mailto:support@ribobio.com)

## 双荧光素酶载体构建实验报告

### 实验简介

利用 PCR 方法, 根据 KLF3 (*Ovis aries*) 3'UTR 序列信息设计其扩增引物, 以 *Ovis aries* 基因组 DNA 为模板 PCR 扩增 KLF3 基因的 3' UTR 序列, 将其克隆到 **pmiR-RB-REPORT™** 双荧光素酶报告载体中, 所用载体的报告荧光为 hRluc, 校正荧光为 hluc (做内参校正)。

### 实验步骤及结果:

#### 一、基因序列分析

对基因序列及载体序列分析, 可以利用 **XhoI**, **NotI** 两个限制性内切酶将目的基因片段克隆到载体中, 载体图谱如下:



设计扩增引物如下:

oar\_KLF3\_3UTR\_F: GGC**GGCTCGAG**AGTGTTGCACTAATGTGGA

oar\_KLF3\_3UTR\_R: AAT**GCGGCCGCG**GAGTAGAAACAGAGAAGGAAC

红色分别为 **XhoI**, **NotI** 酶切位点序列, 之前序列为保护碱基, 引物扩增总长度为 607bp。

oar\_KLF3\_mut\_F: TATATTTTATTTCGAAATAAGACTGAATGGGTA

oar\_KLF3\_mut\_R: GTCTATTTTCGAATAAAAATATATTACTTTA

#### 二、PCR

反应体系设计为 30  $\mu$ l 总体系, 具体是 5 $\times$ Phusion Buffer 6  $\mu$ l, 2.5 mM dNTP mix 2.4  $\mu$ l, 上下游引物 (10  $\mu$ M) 各 1  $\mu$ l, Phusion DNA 聚合酶 (2 U/ $\mu$ l) 0.3  $\mu$ l, DNA 模板 1  $\mu$ l (约 100 ng), 用灭菌水补足 30  $\mu$ l 体系。反应条件为 (降落 PCR): 98 $^{\circ}$ C 2 分钟预变性, 循环内 98 $^{\circ}$ C 10 秒变性, 从 65 $^{\circ}$ C 每个循环降 1 $^{\circ}$ C 退火, 72 $^{\circ}$ C 延伸 30 秒, 10 个循环; 再 98 $^{\circ}$ C 10 秒变性, 60 $^{\circ}$ C 退火, 72 $^{\circ}$ C 延伸 30 秒, 进行 15 个循环; PCR 反应循环后 72 $^{\circ}$ C 继续延伸 3 分钟, 然后 4 $^{\circ}$ C 保存。

PCR 反应完取 5  $\mu$ l PCR 产物进行 1.5% 琼脂糖电泳分析, 如下:



备注：M: D2000；扩增大小与理论大小相符。

### 三、PCR 产物的纯化

按照凝胶纯化试剂盒说明书进行纯化产物。

### 四、酶切

用 *XhoI*, *NotI* 对上述纯化产物和载体进行双酶切，酶切反应体系如下：10×H 缓冲液 4  $\mu\text{l}$ ，DNA 约 2  $\mu\text{g}$ ，内切酶(10 U/ $\mu\text{l}$ ) 各 1  $\mu\text{l}$ ，灭菌去离子水补足到 40  $\mu\text{l}$ 。反应条件 37 $^{\circ}\text{C}$ ，4 小时。

### 五、酶切回收纯化

酶切后回收纯化酶切产物。按照纯化试剂盒说明书进行纯化产物。

### 六、连接

连接反应体系如下：

目的片段 DNA 2  $\mu\text{l}$ (约 150 ng)，载体 0.5  $\mu\text{l}$ (约 50 ng)，solution I 快速连接液 5  $\mu\text{l}$ ，灭菌去离子水补足到 10  $\mu\text{l}$ ，16 $^{\circ}\text{C}$  连接 30 分钟。

### 七、转化

- 1、取连接产物加到 100  $\mu\text{l}$  DH5 $\alpha$  感受态细胞中混匀，冰浴 30 分钟。
- 2、将上述转化液置于 42 $^{\circ}\text{C}$  水浴 90 秒，取出后立即置于冰浴中放置 2-3 分钟。
- 3、向其中加入 900  $\mu\text{l}$  37 $^{\circ}\text{C}$  预热的 LB（不含抗生素）培养基，150 rpm、37 $^{\circ}\text{C}$  振荡培养 45 分钟。
- 4、2500 rpm 离心 5 分钟，将上清液吸走，留 100  $\mu\text{l}$  混匀菌液，加到含 Amp 抗生素 LB 固体琼脂培养基上（抗生素浓度 100  $\mu\text{g}/\text{ml}$ ），用无菌的弯头玻璃棒轻轻的将细胞均匀涂开。待平板表面干燥后，倒置平板，37 $^{\circ}\text{C}$  培养 12-16 小时。

### 八、菌落 PCR 鉴定

挑取上述平板上的单菌落，溶到 3  $\mu\text{l}$  水中，取 0.5  $\mu\text{l}$  做模板，进行 PCR。反应体系设计为 10  $\mu\text{l}$  总体系，具体是 10×Taq buffer Buffer 1  $\mu\text{l}$ ，25 mM MgCl<sub>2</sub> 1.6  $\mu\text{l}$ ，2.5 mM dNTP mix 1  $\mu\text{l}$ ，载体上下游引物（10  $\mu\text{M}$ ）各 0.5  $\mu\text{l}$ ，Taq DNA 聚合酶（2.5 U/ $\mu\text{l}$ ）0.3  $\mu\text{l}$ ，

DNA 模板 0.5  $\mu$ l (约 100 ng), 用灭菌水补足 10  $\mu$ l 体系。反应条件为 95 $^{\circ}$ C 3 分钟预变性, 循环内 95 $^{\circ}$ C 30 秒变性, 56 $^{\circ}$ C 退火, 72 $^{\circ}$ C 延伸 1 分钟; 20 个循环; PCR 反应循环后 72 $^{\circ}$ C 继续延伸 3 分钟, 然后 4 $^{\circ}$ C 保存。

实验共挑取 5 个菌落, 进行 PCR。PCR 反应完取 5  $\mu$ l PCR 产物进行 1.5% 琼脂糖电泳分析, 用载体上游和载体下游引物扩增的条带理论大小为 850bp 左右, 其实际扩增条带如下:

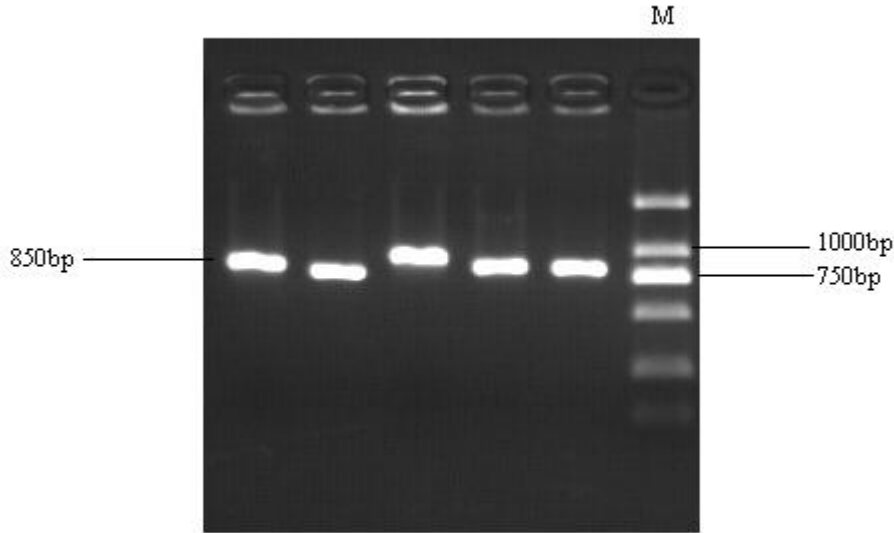

备注: M: D2000 ; 菌 P 大小与理论大小相符。

#### 九、将阳性的克隆送测序公司测序进一步鉴定 (广州市锐博生物科技有限公司), 详细测序结果请参考附件

(加黑划线标注为插入序列, 两边为载体序列)

```
GGACGCTCCAGATGAAAATGGGTAAGTACATCAAGAGCTTCGTGGAGCGCGTGCTGAAGAACGAGCAGTAATTCTAGGCGA
TCGCTCGAGAGTGTGACTAATGTGGAATTTGAAAACTATATTGCTGATACTGTATATCTGCACATCATTCCCTGATTAGATT
GTTTAAAAGACAATCTCAAAGGTCTAAGGTTTTAAAATAATTTGGTTGGTTTAAAATACACAGTCATCTTGAAGGAATCAC
TGTCATGCATGAAGTTGTTTCAGAGTGGTCTTATTCTCTTCTGGTCAAGGTTAACAATTTCTAAATGATTGCAAATTCACCTA
AATAATACATTTACAAAGCCATTTTACATGCATTAACGAGGGCTACAACAATACTATGTTTTACAAATACTAGCACTTTTTTT
TTGCTGTTATGTACTTAGTGTAGAGGGTCAAATAATCTTCTGCTTAGCATCTCTTAAACCATACCTGCAAATATAGCAGGA
TTATTACATTTACAGTACTTTAATACTTGTATAAACTATGCAGAAATTTTAAATAAAGTGTAATATATTTTATAAGCTAATAAGAC
TGAATGGGTAAAGGTTTTTAGCATGCATTAGTATACTTGCAAATACTGAAACATTTTGGTAATCTTCTTACTAAAGATGTGAA
TGTTAATGTTTCCTTCTCTGTTTCTACTCGCGGCCGCTGGCCGCAATAAAATATCTTTAATTTTTCATTACATCTGTGTGTTGGTT
TTTTGTGTGAGGATCTAAATGAGTCTTCGGACCTCGCGGGGG
```

#### 十、突变载体构建

利用 PCR 突变的方法, 在野生型载体基础上, 设计突变引物将靶序列 **ATAAGCT** 突变为 **TATTCGA**。

##### 1、突变分段 PCR

以野生型载体为模板, 分别扩增含突变序列的两段序列。反应体系设计为 30  $\mu$ l 总体系, 具体是 5 $\times$ Phusion Buffer 6  $\mu$ l, 2.5 mM dNTP mix 2.4  $\mu$ l, 上下游引物 (10  $\mu$ M) 各 1  $\mu$ l (上游引物与突变下游引物配对, 突变上游引物与下游引物配对), Phusion DNA 聚合酶 (2 U/ $\mu$ l) 0.3  $\mu$ l, DNA 模板 1  $\mu$ l (约 100 ng), 用灭菌水补足 30  $\mu$ l 体系。反应条件为 (降落 PCR): 98 $^{\circ}$ C 2 分钟预变性, 循环内 98 $^{\circ}$ C 10 秒变性, 从 65 $^{\circ}$ C 每个循环降 1 $^{\circ}$ C 退火, 72 $^{\circ}$ C 延伸 30 秒; 10 个循环; 再 98 $^{\circ}$ C 10 秒变性, 60 $^{\circ}$ C 退火, 72 $^{\circ}$ C 延伸 30 秒, 进行 15 个循环; PCR 反应循环后 72 $^{\circ}$ C 继续延伸 3 分钟, 然后 4 $^{\circ}$ C 保存。

PCR 反应完取 PCR 产物进行1.5%琼脂糖电泳分析并纯化回收。按照纯化试剂盒说明书进行纯化产物。

## 2、突变两段拼接

反应体系设计为10  $\mu$ l 总体系，具体是上述纯化产物各取1  $\mu$ l，5 $\times$ Phusion Buffer 2  $\mu$ l，2.5 mM dNTP mix 0.8  $\mu$ l。Phusion DNA 聚合酶（2 U/ $\mu$ l）0.1  $\mu$ l，用灭菌水补足10  $\mu$ l 体系。反应条件为（降落 PCR）：98 $^{\circ}$ C 2分钟预变性，循环内98 $^{\circ}$ C 10 秒变性，从60 $^{\circ}$ C每个循环降1 $^{\circ}$ C退火，72 $^{\circ}$ C延伸30秒，7个循环；再98 $^{\circ}$ C 10秒变性，55 $^{\circ}$ C退火，72 $^{\circ}$ C延伸30秒，进行10个循环；PCR 反应循环后72 $^{\circ}$ C继续延伸3分钟，然后4 $^{\circ}$ C保存。

## 3、拼接后 PCR

反应体系设计为30  $\mu$ l 总体系，具体是5 $\times$ Phusion Buffer 6  $\mu$ l，2.5 mM dNTP mix 2.4  $\mu$ l，上下游引物（10  $\mu$ M）各1  $\mu$ l，Phusion DNA 聚合酶（2 U/ $\mu$ l）0.3  $\mu$ l，DNA 模板1  $\mu$ l（约100 ng），用灭菌水补足30  $\mu$ l 体系。反应条件为（降落 PCR）：98 $^{\circ}$ C 2分钟预变性，循环内98 $^{\circ}$ C 10 秒变性，从65 $^{\circ}$ C每个循环降1 $^{\circ}$ C退火，72 $^{\circ}$ C延伸30秒，10个循环；再98 $^{\circ}$ C 10秒变性，60 $^{\circ}$ C退火，72 $^{\circ}$ C延伸30秒，进行15个循环；PCR 反应循环后72 $^{\circ}$ C继续延伸3分钟，然后4 $^{\circ}$ C保存。

PCR 反应完取 PCR 产物进行1.5%琼脂糖电泳分析并纯化回收。按照纯化试剂盒说明书进行纯化产物。

## 4、酶切

用 *XhoI*，*NotI* 对上述纯化产物和载体进行双酶切，酶切反应体系如下：10 $\times$ H 缓冲液 4  $\mu$ l，DNA 约2  $\mu$ g，内切酶(10 U/ $\mu$ l) 各1  $\mu$ l，灭菌去离子水补足到40  $\mu$ l。反应条件37 $^{\circ}$ C，4小时。

## 5、酶切回收纯化

酶切后回收纯化酶切产物。按照纯化试剂盒说明书进行纯化产物。

## 6、连接

连接反应体系如下：

目的片段 DNA 2  $\mu$ l(约150ng)，载体0.5  $\mu$ l(约50ng)，solution I 快速连接液 5  $\mu$ l，灭菌去离子水补足到10  $\mu$ l，16 $^{\circ}$ C连接30分钟。

## 7、转化

- 1) 取连接产物10  $\mu$ l 加到100  $\mu$ l DH5 $\alpha$ 感受态细胞中，混匀，冰浴30分钟。
- 2) 将上述转化液置于42 $^{\circ}$ C水浴90秒，取出后立即置于冰浴中放置2-3分钟。
- 3) 向其中加入900  $\mu$ l 37 $^{\circ}$ C预热的LB(不含抗生素)培养基，150 rpm、37 $^{\circ}$ C振荡培养45分钟。
- 4) 2500 rpm离心5分钟，将上清液吸走，留100  $\mu$ l混匀菌液，加到含Amp抗生素LB固体琼脂培养基上(抗生素浓度100  $\mu$ g/ml)，用无菌的弯头玻棒轻轻的将细胞均匀涂开。待平板表面干燥后，倒置平板，37 $^{\circ}$ C培养12-16小时。

## 8、菌落扩大培养提取质粒

挑取上述平板上的单菌落，接种到含 Amp 抗生素（抗生素浓度100  $\mu$ g/ml）的4 ml LB 液体培养基中，于220 rpm 摇床培养12小时；然后提取质粒。

将质粒送测序公司测序鉴定，详细测序峰图结果请参考附件。

测序结果显示，成功将靶序列 **ATAAGCT 突变为 TATTCGA**。



G C A G A A A T T T T T A A T A A A G T G T A A T A T A T T T T T A T A A G C T A A T A A G A C T G A A T G G G T A A A G G T T T



KLF3-WT

G A A A T T T T T A A T A A A G T G T A A T A T A T T T T T A T T C G A A A T A A G A C T G A A T G G G T A A A G G T T



KLF3-MUT

### 主要试剂

|                                               |                  |
|-----------------------------------------------|------------------|
| LB 培养基: 蛋白胨 (tryptone), 酵母提取物 (yeast extract) | OXOID 公司 (英)     |
| 限制性内切酶                                        | Fermentas 公司     |
| TIANprep Mini Plasmid Kit 质粒小提试剂盒             | 天根生化科技 (北京) 有限公司 |
| Phusion DNA 聚合酶                               | Fermentas 公司     |
| 琼脂糖                                           | 西班牙 BioWest 公司   |
| Universal DNA Purification Kit DNA 纯化回收试剂盒    | 天根生化科技 (北京) 有限公司 |
| 连接反应液                                         | Fermentas 公司     |
| 普通 DNA 聚合酶                                    | Fermentas 公司     |
| DH5α 感受态细胞                                    | 天根生化科技 (北京) 有限公司 |

广州市锐博生物科技有限公司  
GUANGZHOU RIBOBIO CO., LTD

地址: 广州开发区科学城科学大道182号创新大厦C3区13层(510663) 电话: (020)32290075 传真: (020)32290137

13/F, Innovation Building C3, 182 kexue Avenue, Science Park, Guangzhou 510663, PR of China

免费热线: 400 686 0075 企业QQ: 4006860075 网站: www.sima.cn www.ribobio.com 邮箱: support@ribobio.com

**主要仪器**

PCR 仪器: Bio-RAD 公司  
引物合成: 苏州金唯智生物科技有限公司  
序列测定: 广州市锐博生物科技有限公司

如果有任何问题，请联系我们！

广州市锐博生物科技有限公司  
地 址: 广州开发区科学城科学大道 182 号创新大厦 C3 区 13 层  
电 话: (020) 32290075  
邮 箱: [service@ribobio.com](mailto:service@ribobio.com)

**广州市锐博生物科技有限公司**  
GUANGZHOU RIBOBIO CO., LTD

地址: 广州开发区科学城科学大道182号创新大厦C3区13层(510663) 电话: (020)32290075 传真: (020)32290137

13/F, Innovation Building C3, 182 kexue Avenue, Science Park, Guangzhou 510663, PR of China

免费热线: 400 686 0075 企业QQ: 4006860075 网站: [www.sima.cn](http://www.sima.cn) [www.ribobio.com](http://www.ribobio.com) 邮箱: [support@ribobio.com](mailto:support@ribobio.com)
